# Supplementary material
Source: HighWire-hosted journal article supplement (https://www.annfammed.org/highwire/filestream/15228/field_highwire_adjunct_files/0/Bertels_Supp.pdf)
Supplement: Bertels_Supp.pdf [file Bertels_Supp.pdf]

| Supplemental Table 1. Overview of Questionnaire |              |                                                                                                                                                                                    |                                                 |                                                                          |
|-------------------------------------------------|--------------|------------------------------------------------------------------------------------------------------------------------------------------------------------------------------------|-------------------------------------------------|--------------------------------------------------------------------------|
| Topic                                           | Question No. | Items and scoring                                                                                                                                                                  | Reference                                       | Supplementary description                                                |
| Front-page, explanation                         |              |                                                                                                                                                                                    | Based on Bevolkingsonderzoek & Gfk <sup>1</sup> | Letter type (Arial) suitable for individuals with low literacy.          |
| Introduction                                    | 1            | <i>You received an appointment for an internal bowel examination from the national population screening for bowel cancer. Did you subsequently undergo this bowel examination?</i> | Items are self-developed                        | Addresses if respondent has had colonoscopy inside of screening program. |

|  |   |                                                                                                                                                                                                    |  |                                                                                           |
|--|---|----------------------------------------------------------------------------------------------------------------------------------------------------------------------------------------------------|--|-------------------------------------------------------------------------------------------|
|  |   | 1 (2 point: yes/no)                                                                                                                                                                                |  |                                                                                           |
|  | 2 | <p><i>Did you undergo an internal bowel examination outside of the national population screening for bowel cancer?</i></p> <p>1 (4 point: No, via GP, via specialist or other way - specified)</p> |  | If no, addresses if colonoscopy took place outside of program and outcome of colonoscopy. |
|  | 3 | <p><i>Are you planning to have an internal bowel examination done within 6 months?</i></p> <p>1 (3 point: Yes, no, I don't know (yet))</p>                                                         |  | If no colonoscopy: addresses if there are plans for colonoscopy.                          |

|                                    |   |                                                                                                                                                                                                                                                                                                                                                 |                                                                                                                                                  |                                                            |
|------------------------------------|---|-------------------------------------------------------------------------------------------------------------------------------------------------------------------------------------------------------------------------------------------------------------------------------------------------------------------------------------------------|--------------------------------------------------------------------------------------------------------------------------------------------------|------------------------------------------------------------|
| Reasons not to undergo colonoscopy | 4 | <i>What are your most important reasons for not undergoing the internal bowel examination?</i>                                                                                                                                                                                                                                                  | Items are self-developed, based on interviews.                                                                                                   | Addresses reasons not to undergo colonoscopy               |
| Reasons to undergo colonoscopy     | 5 | 1 (open question)<br><br><i>What are your most important reasons for undergoing the internal bowel examination?</i><br><br>1 (open question)                                                                                                                                                                                                    | Items are self-developed, based on interviews.                                                                                                   | Addresses reasons to undergo colonoscopy                   |
| Physical complaints                | 6 | <i>This question is about the period in which you received the letter with the test result of the stool test. Did you have any of the following complaints in that period?</i><br><br><i>Visible blood in the stool</i><br><br><i>The urge to produce stool without being able too, or the feeling that the bowel is not completely emptied</i> | Based on information by the MaagLeverDarm Stichting <sup>2</sup> and advice from Evelien Dekker.<br><br>Likert scale based on Limesurvey example | 7 original items, 5 most indicative for CRC were selected. |

|                                        |   |                                                                                                                                                                                                                                                                                                                                                                   |                                                          |                                                                                                |
|----------------------------------------|---|-------------------------------------------------------------------------------------------------------------------------------------------------------------------------------------------------------------------------------------------------------------------------------------------------------------------------------------------------------------------|----------------------------------------------------------|------------------------------------------------------------------------------------------------|
|                                        |   | <p>2 (5 point: daily to never)</p> <p><i>This question is about the period in which you received the letter with the test result of the stool test. Did you have the following complaints in that period?</i></p> <p><i>Different stools than normal, for several weeks</i></p> <p><i>Unexplained weight loss</i></p> <p>5 (5 point: Extremely to not at all)</p> | <p>Likert scale based on S. Brown (2010)<sup>3</sup></p> |                                                                                                |
| Alternative explanation blood in stool | 7 | <p><i>Think back to the time you received the letter with the test result of the stool test. Did you yourself, at that time, have an explanation for the blood that was</i></p>                                                                                                                                                                                   | <p>Item is self-developed, based on interviews.</p>      | <p>Addresses if respondent had an alternative explanation for the blood found in the stool</p> |



|                                                    |    |                                                                                                                                                                                                                 |                                                        |                                                                                  |
|----------------------------------------------------|----|-----------------------------------------------------------------------------------------------------------------------------------------------------------------------------------------------------------------|--------------------------------------------------------|----------------------------------------------------------------------------------|
|                                                    |    | <p><i>Did these medical problems claim so much of your attention that the unfavourable test result of the stool test was less important for you?</i></p> <p>1 (2 point: yes or no)</p>                          | Based on Llovet, Plumb and interviews. <sup>5, 6</sup> | Addresses if these issues took priority.                                         |
| Treatment by alternative therapist                 | 11 | <p><i>Think back to the time you received the letter with the test result of the stool test. Where you at that time in the care of an alternative practitioner or healer?</i></p> <p>1 (2 point: yes or no)</p> | Item is self-developed, based on interviews.           | Addresses if respondent was under alternative medical treatment                  |
| Under medical supervision for bowel related issues | 12 | <p><i>Think back to the time you received the letter with the test result of the stool test. Where you then in the care of a medical professional for a bowel-related condition?</i></p>                        | Item is self-developed, based on interviews.           | Addresses if the respondent was under medical supervision for colorectal issues. |

|                                  |    |                                                                                                                                                                                                                                                                                                                                                      |                                                                                                                                                             |                                                                                  |
|----------------------------------|----|------------------------------------------------------------------------------------------------------------------------------------------------------------------------------------------------------------------------------------------------------------------------------------------------------------------------------------------------------|-------------------------------------------------------------------------------------------------------------------------------------------------------------|----------------------------------------------------------------------------------|
|                                  |    | 1 (5 point: GP, Specialist, alternative healer, no, don't know/no answer, someone else - specify)                                                                                                                                                                                                                                                    |                                                                                                                                                             |                                                                                  |
| Self-efficacy                    | 13 | <p><i>To what extent do you agree with the following statement?</i></p> <p><i>"I am certain that I will undergo an internal bowel examination in the future when my doctor and I think its necessary. Even if this is painful or embarrassing."</i></p> <p>1 (4 point: completely disagree, disagree a little, agree a little, completely agree)</p> | <p>Based on Douma.<sup>7</sup></p> <p>Derived from Schwarzer and Fuchs.<sup>8</sup></p> <p>Likert scale English translation based on Brown.<sup>3</sup></p> | Addresses the belief in the ability to succeed in undergoing colonoscopy         |
| Past experience with colonoscopy | 14 | <i>Have you ever had an internal bowel examination before your participation in the population screening for bowel cancer?</i>                                                                                                                                                                                                                       | Item is self-developed, based on interviews.                                                                                                                | Addresses if respondent had a colonoscopy before participating in CRC screening. |

|                                       |    |                                                                                                                                                                                                                                                                                                                  |                                                     |                                                                                                               |
|---------------------------------------|----|------------------------------------------------------------------------------------------------------------------------------------------------------------------------------------------------------------------------------------------------------------------------------------------------------------------|-----------------------------------------------------|---------------------------------------------------------------------------------------------------------------|
|                                       | 15 | <p>1 (2 point: yes or no)</p> <p><i>How did you feel about having this internal examination with regard to:</i></p> <p><i>The preparation</i></p> <p><i>Pain during the examination</i></p> <p><i>Embarrassment</i></p> <p>3 (4 point: Very tolerable, A bit tolerable, Not tolerable, Not tolerable at all)</p> | <p>Item is derived from Douma<sup>7</sup></p>       | <p>Addresses previous experience with colonoscopy, specifically the preparations, pain and embarrassment.</p> |
| Experience of others with colonoscopy | 16 | <p><i>Do you know anyone who has had an internal bowel examination?</i></p>                                                                                                                                                                                                                                      | <p>Item is self-developed, based on interviews.</p> | <p>Addresses if people in direct social environment underwent colonoscopy</p>                                 |



|                   |    |                                                                                                                                                                                                                          |                                              |                                                                      |
|-------------------|----|--------------------------------------------------------------------------------------------------------------------------------------------------------------------------------------------------------------------------|----------------------------------------------|----------------------------------------------------------------------|
|                   | 17 | <p>1 (2 point: yes or no)</p> <p><i>What did this person or persons think of the internal bowel examination?</i></p> <p>3 (5 point: Very tolerable, A bit tolerable, Undecided, A bit intolerable, Very intolerable)</p> | Item is derived from Douma <sup>7</sup>      | Addresses how unpleasant their experiences were                      |
|                   | 18 | <p><i>Did the experiences of others influence your decision to undergo or refuse the internal bowel examination?</i></p> <p>1 (2 point: yes or no)</p>                                                                   | Item is self-developed, based on interviews. | Addresses if respondent was influenced by other peoples experiences. |
| History of cancer | 19 | <p><i>Have you ever been diagnosed with cancer?</i></p> <p>1 (3 point: yes, CRC – yes, other cancer, no)</p>                                                                                                             | Item is self-developed, based on interviews. | Addresses personal history of cancer                                 |

|                    |    |                                                                                                                                                                                                                                           |                                                    |                                                                      |
|--------------------|----|-------------------------------------------------------------------------------------------------------------------------------------------------------------------------------------------------------------------------------------------|----------------------------------------------------|----------------------------------------------------------------------|
| GP contact         | 20 | <p><i>Have you discussed the unfavourable test result of the stool test in the population screening for bowel cancer with your family physician (huisarts)?</i></p> <p>1 (2 point: yes or no)</p>                                         | Item is self-developed, based on interviews.       | Addresses if respondent had contact with their GP to talk about FIT+ |
| Advice from others | 21 | <p><i>Has anyone recommended AGAINST having the internal bowel examination?</i></p> <p>1 (2 point: yes or no)</p>                                                                                                                         | Items are self-developed, derived from interviews. | Addresses if respondent received advice against colonoscopy          |
|                    | 22 | <p><i>Choose all answers that apply. The person who recommended against having an internal bowel examination was:</i></p> <p>1 (9 points: partner, GP, specialist, alternative healer, nurse, during intake, family, friend or other)</p> |                                                    | Addresses who advised against colonoscopy                            |

|  |    |                                                                                                                                                                                                                                                                                                                                                                                                                                                                                                 |  |                                                                  |
|--|----|-------------------------------------------------------------------------------------------------------------------------------------------------------------------------------------------------------------------------------------------------------------------------------------------------------------------------------------------------------------------------------------------------------------------------------------------------------------------------------------------------|--|------------------------------------------------------------------|
|  | 23 | <p><i>Choose all answers that apply. The reason I was recommended not to undergo an internal bowel examination was:</i></p> <p>1 (11 point: previous colonoscopy, small chance of CRC, colonoscopy is unpleasant, colonoscopy is dangerous, other explanation for blood, the population screening is not to be trusted, during colonoscopy, only polyps will be found, the result of FIT is unreliable, I'm seriously ill, colonoscopy is impossible for medical reasons, other, namely...)</p> |  | Addresses reasons to advice against colonoscopy                  |
|  | 24 | <p><i>Has anyone recommended IN FAVOUR of having an internal bowel examination?</i></p> <p>1 (2 point: yes or no)</p>                                                                                                                                                                                                                                                                                                                                                                           |  | Addresses if respondent received advice in favour of colonoscopy |

|                             |    |                                                                                                                                                                                                                                                                                                                                                   |                                                                                   |                                                                                                                                                                                                                                            |
|-----------------------------|----|---------------------------------------------------------------------------------------------------------------------------------------------------------------------------------------------------------------------------------------------------------------------------------------------------------------------------------------------------|-----------------------------------------------------------------------------------|--------------------------------------------------------------------------------------------------------------------------------------------------------------------------------------------------------------------------------------------|
|                             | 25 | <p><i>Choose all answers that apply. The person who recommended in favour of having an internal bowel examination was:</i></p> <p>1 (9 points: partner, GP, specialist, alternative healer, nurse, during intake, family, friend or other, namely...)</p>                                                                                         |                                                                                   | Addresses who advised in favour of colonoscopy                                                                                                                                                                                             |
| Normative beliefs of others | 26 | <p><i>Below are two statements about participating in the population screening for bowel cancer. Please indicate to what extent you agree with each statement by ticking the box below your answer. <b>There is no right or wrong answer.</b></i></p> <p><i>I think my loved ones would want me to undergo the internal bowel examination</i></p> | Derived from Tacken et al. <sup>9</sup> Likert scale based on Brown. <sup>3</sup> | Items that measure the expectation of the normative believe of others are derived from Tacken et al: the belief that the partner thinks participant should get screening and the belief the GP thinks the participant should get screened. |

|                        |                     |                                                                                                                                                                                                                                                                                                                                                                                                          |                                               |                                                                                                                                                                        |
|------------------------|---------------------|----------------------------------------------------------------------------------------------------------------------------------------------------------------------------------------------------------------------------------------------------------------------------------------------------------------------------------------------------------------------------------------------------------|-----------------------------------------------|------------------------------------------------------------------------------------------------------------------------------------------------------------------------|
|                        |                     | <p><i>I think my family physician (huisarts) would want me to undergo the internal bowel examination</i></p> <p>2 (5 point: strongly agree, agree, undecided, disagree strongly disagree)</p>                                                                                                                                                                                                            |                                               |                                                                                                                                                                        |
| Experience with intake | <p>27</p> <p>28</p> | <p><i>The appointment that takes place before the internal bowel examination is called the intake. Have you been to the intake?</i></p> <p>1 (2 point: yes or no)</p> <p><i>During this intake, did you have:</i></p> <p><i>Sufficient opportunity to discuss any concerns?</i></p> <p><i>Sufficient opportunity to ask questions?</i></p> <p><i>Sufficient opportunity to discuss your options?</i></p> | Item are self-developed, based on interviews. | <p>Addresses is respondent went to intake.</p> <p>Addresses if respondent had opportunity to discuss worries, ask questions and discuss options during the intake.</p> |

|                       |    |                                                                                                                                                                                                                      |                                                    |                                                                       |
|-----------------------|----|----------------------------------------------------------------------------------------------------------------------------------------------------------------------------------------------------------------------|----------------------------------------------------|-----------------------------------------------------------------------|
|                       |    | 3 (2 point: yes, enough and no, not enough)                                                                                                                                                                          |                                                    |                                                                       |
| Other intake location | 29 | <p><i>During the intake, were you referred to another location (clinic or hospital) because the internal bowel examination could not take place at the location of the intake?</i></p> <p>1 (2 point: yes or no)</p> | Items are self-developed, derived from interviews. | Addresses if respondent was referred to other location during intake. |
|                       | 30 | <p><i>Was this because you would need more specialized care than was possible at the location of the intake?</i></p> <p>1 (2 point: yes or no)</p>                                                                   |                                                    | Only if Q29 =yes.                                                     |

|                                 |       |                                                                                                                                                                                                                                                                                                                                                                   |                                                              |                                                                                   |
|---------------------------------|-------|-------------------------------------------------------------------------------------------------------------------------------------------------------------------------------------------------------------------------------------------------------------------------------------------------------------------------------------------------------------------|--------------------------------------------------------------|-----------------------------------------------------------------------------------|
| CRC diagnosis the previous year | 31    | <p><i>Were you diagnosed with bowel cancer in the past year?</i></p> <p>1 (2 point: yes or no)</p>                                                                                                                                                                                                                                                                | Item is self-developed                                       | Assesses if respondent needs to fill in Q 38-40. If CRC diagnosis > skip Q 32-40. |
| Cancer-specific distress        | 32-37 | <p><i>In the time since the unfavourable test result of the stool test in the population screening for bowel cancer:</i></p> <p><i>How often have you thought about your risk of getting bowel cancer?</i></p> <p><i>How often have these thoughts affected your mood?</i></p> <p><i>How often have these thoughts interfered with your daily activities?</i></p> | Based on Lerman et al. <sup>10</sup> and Douma. <sup>7</sup> | Addresses worries about developing cancer and influence of worries on daily life. |

|                 |    |                                                                                                                                                                                                                                                                                                                   |                                            |                                                                                                                |
|-----------------|----|-------------------------------------------------------------------------------------------------------------------------------------------------------------------------------------------------------------------------------------------------------------------------------------------------------------------|--------------------------------------------|----------------------------------------------------------------------------------------------------------------|
|                 |    | <p><i>How often were you concerned about the possibility of getting bowel cancer at some point in your life?</i></p> <p><i>How often have you worried about developing bowel cancer?</i></p> <p><i>How much of a problem was this worry?</i></p> <p>6 (4 point: almost never, sometime, often, almost always)</p> |                                            |                                                                                                                |
| Risk perception | 38 | <p><i>What did you think of your chance of having bowel cancer after receiving the unfavourable result of the stool test?</i></p> <p>1 (7 points: almost zero – almost sure)</p>                                                                                                                                  | Derived from Weinstein et al <sup>11</sup> | According to Weinstein et al, a 7-point scale measures risk perceptions more effectively than a 5-point scale. |



|                      |    |                                                                                                                                                                                                                                                                                                                                                                                                                                                                                                                     |                                                                                          |                                                                                  |
|----------------------|----|---------------------------------------------------------------------------------------------------------------------------------------------------------------------------------------------------------------------------------------------------------------------------------------------------------------------------------------------------------------------------------------------------------------------------------------------------------------------------------------------------------------------|------------------------------------------------------------------------------------------|----------------------------------------------------------------------------------|
|                      | 39 | <p><i>When I compare myself with other people, my chance of having bowel cancer is:</i></p> <p>1 (7 points: a lot smaller – a lot larger)</p>                                                                                                                                                                                                                                                                                                                                                                       |                                                                                          |                                                                                  |
| Willingness to treat | 40 | <p><i>Below are a few statements about the treatment of bowel cancer. Please indicate to what extent you agree with each statement by ticking the box below your answer. <b>There is no right or wrong answer.</b></i></p> <p><i>If I had bowel cancer, it would seem to me that treating bowel cancer is worse than doing nothing</i></p> <p><i>If I had bowel cancer, I would have surgery if this was recommended</i></p> <p><i>If I had bowel cancer, I would have chemotherapy if this was recommended</i></p> | Items are self-developed, based on interviews. Likert scale based on Brown. <sup>3</sup> | Items address the willingness to undergo traditional (medical) cancer treatment. |

|                         |    |                                                                                                                                                                                                                                                                                                         |                                          |                                                                         |
|-------------------------|----|---------------------------------------------------------------------------------------------------------------------------------------------------------------------------------------------------------------------------------------------------------------------------------------------------------|------------------------------------------|-------------------------------------------------------------------------|
|                         |    | <p><i>If I had bowel cancer, I would mainly seek alternative treatment</i></p> <p><i>If I had bowel cancer, I would not get treatment</i></p> <p>5 (5 point: strongly agree, agree, undecided, disagree strongly disagree)</p>                                                                          |                                          |                                                                         |
| Health locus of control | 41 | <p><i>Below are a few statements about illness and health.</i></p> <p><i>Please indicate to what extent you agree with each statement by ticking the box below your answer.</i></p> <p><b><i>There is no right or wrong answer.</i></b></p> <p><i>No matter what I do, I 'm likely to get sick.</i></p> | Based on Wallston KA et al <sup>12</sup> | Measures 3 domains of locus of control: internal, physician and chance. |

|  |  |                                                                                                                                                                                                                                                                                                                                                                                                                                                                                                                                                   |  |  |
|--|--|---------------------------------------------------------------------------------------------------------------------------------------------------------------------------------------------------------------------------------------------------------------------------------------------------------------------------------------------------------------------------------------------------------------------------------------------------------------------------------------------------------------------------------------------------|--|--|
|  |  | <p><i>If I become sick, I have the power to make myself well again</i></p> <p><i>My good health is largely a matter of good fortune</i></p> <p><i>Whenever I recover from an illness, it's usually because my doctor has been taking good care of me</i></p> <p><i>Whenever I don't feel well, I should consult a medically trained professional.</i></p> <p><i>If I take care of myself, I can avoid illness</i></p> <p><i>Regarding my health, I can only do what my doctor tells me to do</i></p> <p><i>When I get sick, I am to blame</i></p> |  |  |
|--|--|---------------------------------------------------------------------------------------------------------------------------------------------------------------------------------------------------------------------------------------------------------------------------------------------------------------------------------------------------------------------------------------------------------------------------------------------------------------------------------------------------------------------------------------------------|--|--|

*I can only maintain my health by consulting health professionals*

*Luck plays a big part in determining how soon I will recover from an illness*

*The main thing which affects my health is what I myself do*

*Most things that affect my health happen to me by accident*

*Health professionals control my health*

*I am in control of my health*

|                             |                                                                                                                                                                                                                                                                                                                                                                                                                                                                                                                                                    |                                               |                                                                      |
|-----------------------------|----------------------------------------------------------------------------------------------------------------------------------------------------------------------------------------------------------------------------------------------------------------------------------------------------------------------------------------------------------------------------------------------------------------------------------------------------------------------------------------------------------------------------------------------------|-----------------------------------------------|----------------------------------------------------------------------|
| Positive bodily experiences | <p><i>Having regular contact with my physician is the best way for me to avoid illness</i></p> <p><i>It seems that my health is greatly influenced by accidental happenings</i></p> <p><i>If I get sick, it is my own behavior which determines how soon I get well again</i></p> <p><i>Often I feel that no matter what I do, if I am going to get sick, I will get sick</i></p> <p>18 (6 point: absolutely disagree, disagree, disagree a bit, agree a little, agree, absolutely agree)</p> <p><i>If I had bowel cancer, I would feel it</i></p> | Items are self-developed, based on interviews | Measures positive bodily experiences of influence to risk perception |
|-----------------------------|----------------------------------------------------------------------------------------------------------------------------------------------------------------------------------------------------------------------------------------------------------------------------------------------------------------------------------------------------------------------------------------------------------------------------------------------------------------------------------------------------------------------------------------------------|-----------------------------------------------|----------------------------------------------------------------------|

|              |  |                                                                                                                                                                                                                                                                                                                                                                                                                                                                                    |                                               |                                       |
|--------------|--|------------------------------------------------------------------------------------------------------------------------------------------------------------------------------------------------------------------------------------------------------------------------------------------------------------------------------------------------------------------------------------------------------------------------------------------------------------------------------------|-----------------------------------------------|---------------------------------------|
| Risk factors |  | <p><i>I can check for signs of bowel cancer myself, even if I don't have an internal bowel investigation</i></p> <p><i>If I feel healthy, I assume I do not have bowel cancer</i></p> <p>3 (6 point: absolutely disagree, disagree, disagree a bit, agree a little, agree, absolutely agree)</p> <p><i>My chance of bowel cancer is small, because no one in my family has had it</i></p> <p><i>My chance of bowel cancer is small, because I maintain a healthy lifestyle</i></p> | Items are self-developed, based on interviews | Measures self-identified risk factors |
|--------------|--|------------------------------------------------------------------------------------------------------------------------------------------------------------------------------------------------------------------------------------------------------------------------------------------------------------------------------------------------------------------------------------------------------------------------------------------------------------------------------------|-----------------------------------------------|---------------------------------------|

|                 |    |                                                                                                                                                                                                                                                                                                                                |                                                                                                     |                                                                                                                                                   |
|-----------------|----|--------------------------------------------------------------------------------------------------------------------------------------------------------------------------------------------------------------------------------------------------------------------------------------------------------------------------------|-----------------------------------------------------------------------------------------------------|---------------------------------------------------------------------------------------------------------------------------------------------------|
| Evasion of care |    | <p>2 (6 point: absolutely disagree, disagree, disagree a bit, agree a little, agree, absolutely agree)</p> <p><i>If i have a physical complaint I don't go to the doctor timely, even though maybe I should</i></p> <p>1 (6 point: absolutely disagree, disagree, disagree a bit, agree a little, agree, absolutely agree)</p> | Item is self-developed, based on interviews                                                         | Measures evasion of care                                                                                                                          |
| Trust           | 42 | <p><i>Below are a few statements about trust. Please indicate to what extent you agree with each statement by ticking the box below your answer.</i></p> <p><b><i>There is no right or wrong answer.</i></b></p> <p><i>I trust the test result of the stool test: there really was blood in my stool</i></p>                   | <p>Item is self-developed, based on interviews.</p> <p>Likert scale based on Brown.<sup>3</sup></p> | Measures trust in 3 domains: the result of the FIT outcome, in the clinic or hospital performing the colonoscopy and the screenings organisation. |

|                    |    |                                                                                                                                                                                                                                                                                                                     |                                                                                          |                                                                               |
|--------------------|----|---------------------------------------------------------------------------------------------------------------------------------------------------------------------------------------------------------------------------------------------------------------------------------------------------------------------|------------------------------------------------------------------------------------------|-------------------------------------------------------------------------------|
|                    |    | <p><i>I trust that the clinic or hospital where the internal bowel examination is conducted puts my well-being first</i></p> <p><i>I trust that the organization that distributed the stool test puts my well-being first</i></p> <p>3 (5 point: strongly agree, agree, undecided, disagree, strongly disagree)</p> |                                                                                          |                                                                               |
| Desire for control | 43 | <p><i>An internal bowel examination is something I would only do, when it can be done in a way that will cause me as little discomfort as possible</i></p>                                                                                                                                                          | Items are self-developed, based on interviews. Likert scale based on Brown. <sup>3</sup> | Items address desire for control specifically in colorectal cancer screening. |



|  |  |                                                                                                                                                                                                                                                                                                                                                                                                                                                                                                                                                                                                                                                     |                                                                                                                                                         |  |
|--|--|-----------------------------------------------------------------------------------------------------------------------------------------------------------------------------------------------------------------------------------------------------------------------------------------------------------------------------------------------------------------------------------------------------------------------------------------------------------------------------------------------------------------------------------------------------------------------------------------------------------------------------------------------------|---------------------------------------------------------------------------------------------------------------------------------------------------------|--|
|  |  | <p><i>I found it difficult to decide whether or not to undergo an internal bowel examination</i></p> <p><i>I would prefer someone to just tell me that I have to undergo a bowel examination</i></p> <p>3 (5 point: strongly agree, agree, undecided, disagree strongly disagree)</p> <p><i>I did not like the fact that I received a letter with the appointment for the intake already set up</i></p> <p><i>I had too little opportunity to discuss whether I wanted an internal bowel examination in the national population screening for bowel cancer</i></p> <p>2 (5 point: strongly agree, agree, undecided, disagree strongly disagree)</p> | <p>Items derived from the Desirability of Control scale by Burger &amp; Cooper. <sup>13</sup></p> <p>Items are self-developed, based on interviews.</p> |  |
|--|--|-----------------------------------------------------------------------------------------------------------------------------------------------------------------------------------------------------------------------------------------------------------------------------------------------------------------------------------------------------------------------------------------------------------------------------------------------------------------------------------------------------------------------------------------------------------------------------------------------------------------------------------------------------|---------------------------------------------------------------------------------------------------------------------------------------------------------|--|

|                            |    |                                                                                                                                                                                                                                                                                                                                                                                                           |                                                                                          |                                                                                                          |
|----------------------------|----|-----------------------------------------------------------------------------------------------------------------------------------------------------------------------------------------------------------------------------------------------------------------------------------------------------------------------------------------------------------------------------------------------------------|------------------------------------------------------------------------------------------|----------------------------------------------------------------------------------------------------------|
| Intake at unknown location |    | <p><i>The internal bowel examination was at an unfamiliar location, and I did not like that.</i></p> <p>1 (5 point: strongly agree, agree, undecided, disagree strongly disagree)</p>                                                                                                                                                                                                                     |                                                                                          | Item addresses if the intake was at an unknown location, and if this was against the participants wishes |
| Attitudes to life          | 44 | <p><i>Below are a few statements about your attitude to life. Please indicate to what extent you agree with each statement by ticking the box below your answer.</i></p> <p><b><i>There is no right or wrong answer.</i></b></p> <p><i>I'll die when it's my time - the bowel cancer screening will make no difference</i></p> <p><i>I live by the day and don't think about what tomorrow brings</i></p> | Items are self-developed, based on interviews. Likert scale based on Brown. <sup>3</sup> | Addresses attitudes to life that might be a barrier to screening adherence.                              |

|                          |    |                                                                                                                                                                                                                                                                                                                                       |                                                |                                                             |
|--------------------------|----|---------------------------------------------------------------------------------------------------------------------------------------------------------------------------------------------------------------------------------------------------------------------------------------------------------------------------------------|------------------------------------------------|-------------------------------------------------------------|
|                          |    | <p><i>I would rather live a short but good life, than a long life that is less good</i></p> <p><i>I don't feel healthy enough to undergo an internal bowel examination</i></p> <p><i>I feel too old to undergo an internal bowel examination</i></p> <p>5 (5 point: strongly agree, agree, undecided, disagree strongly disagree)</p> |                                                |                                                             |
| Perceptions of screening | 45 | <p><i>Below are a few statements about bowel cancer.</i></p> <p><i>Please indicate if you think a statement is true or untrue by ticking the box below your answer.</i></p>                                                                                                                                                           | Items are self-developed, based on interviews. | Addresses knowledge on screening, CRC and treatment of CRC. |

|  |  |                                                                                                                                                                                                                                                                                                                                                                                                                                                                                                                                                                                                                     |  |  |
|--|--|---------------------------------------------------------------------------------------------------------------------------------------------------------------------------------------------------------------------------------------------------------------------------------------------------------------------------------------------------------------------------------------------------------------------------------------------------------------------------------------------------------------------------------------------------------------------------------------------------------------------|--|--|
|  |  | <p><i>People with bowel cancer always have symptoms before they get a diagnosis</i></p> <p><i>An unfavourable result in the bowel cancer screening usually means that bowel cancer is present</i></p> <p><i>The bowel cancer screening program is primarily intended for people with complaints that may indicate bowel cancer</i></p> <p><i>If the result of the stool test in the bowel cancer population screening is favourable (no blood found), then it is certain that you do not have bowel cancer</i></p> <p><i>The chance that something goes wrong during an internal bowel examination is great</i></p> |  |  |
|--|--|---------------------------------------------------------------------------------------------------------------------------------------------------------------------------------------------------------------------------------------------------------------------------------------------------------------------------------------------------------------------------------------------------------------------------------------------------------------------------------------------------------------------------------------------------------------------------------------------------------------------|--|--|

|  |  |                                                                                                                                                                                                                                                                                                                                                                                                                                                              |                                                                                         |  |
|--|--|--------------------------------------------------------------------------------------------------------------------------------------------------------------------------------------------------------------------------------------------------------------------------------------------------------------------------------------------------------------------------------------------------------------------------------------------------------------|-----------------------------------------------------------------------------------------|--|
|  |  | <p><i>Blood in the stool is a reason to go to the doctor</i></p> <p>6 (3 point: true, not true, don't know)</p> <p><i>If you have complaints of bowel cancer, then it is no longer curable</i></p> <p><i>Bowel cancer normally develops over a period of several years</i></p> <p><i>Removing polyps can prevent bowel cancer</i></p> <p>3 (3 point: true, not true, don't know)</p> <p><i>If bowel cancer is found at an early stage, it is curable</i></p> | <p>Derived from Brandt et al. <sup>14</sup></p> <p>Derived from Tacken <sup>9</sup></p> |  |
|--|--|--------------------------------------------------------------------------------------------------------------------------------------------------------------------------------------------------------------------------------------------------------------------------------------------------------------------------------------------------------------------------------------------------------------------------------------------------------------|-----------------------------------------------------------------------------------------|--|

|                   |    |                                                                                                                                                                |                              |                                                                                                   |
|-------------------|----|----------------------------------------------------------------------------------------------------------------------------------------------------------------|------------------------------|---------------------------------------------------------------------------------------------------|
|                   |    | <p><i>I think most people (more than 75%) who are diagnosed with bowel cancer, die of it</i></p> <p>2 (3 point: true, not true, don't know)</p>                |                              |                                                                                                   |
| <b>Background</b> |    |                                                                                                                                                                |                              | Questions were drawn up to ensure anonymity, in order to meet the demands of the privacy officer. |
| Sex               | 46 | <p><i>Are you male or a female?</i></p> <p>(3 point: male, female, no answer)</p>                                                                              | Based on Douma. <sup>7</sup> |                                                                                                   |
| Age               | 47 | <p><i>What is your age?</i></p> <p>(open text box)</p>                                                                                                         | Item is self-developed       |                                                                                                   |
| Marital status    | 48 | <p><i>What is your marital status?</i></p> <p>(6 point: married/living together, relationship but not living together, single, divorced, widow, no answer)</p> | Based on Douma. <sup>7</sup> | Answers categorised into living with partner yes/no                                               |

|                 |    |                                                                                                                                                                                                                                                                                     |                                                                                                                 |                                                                                                                      |
|-----------------|----|-------------------------------------------------------------------------------------------------------------------------------------------------------------------------------------------------------------------------------------------------------------------------------------|-----------------------------------------------------------------------------------------------------------------|----------------------------------------------------------------------------------------------------------------------|
| Children        | 49 | <p><i>Do you have one or more children?</i></p> <p>(3 point: yes, no, no answer)</p>                                                                                                                                                                                                | Based on Douma. <sup>7</sup>                                                                                    |                                                                                                                      |
| Living area     | 50 | <p><i>Where do you live?</i></p> <p>(6 point: a (very) large place (100.000 inhabitants or more), a middle large place (50.000 to 100.000 inhabitants), a small place (25.000 to 50.000 inhabitants), a very small place (up to 25.000 inhabitants, in the country, no answer.)</p> | Item is self-developed, based on CBS <sup>15</sup> reporting a list of Dutch cities with numbers of inhabitants | Due to privacy legislation, self-reported size of living area is used instead of postal code                         |
| Education level | 51 | <p><i>What is the highest level of education that you have completed?</i></p> <p>(9 point lower school, lower vocational school, high school (lower levels), high school (higher levels), middle vocational school, college, university, other – namely, no answer.)</p>            | Based on Douma. <sup>7</sup><br>(Dutch education system)                                                        | Answers categorised into internationally used 4 category scale (primary, secondary, vocational and higher education) |

|            |    |                                                                                                                                                                                                                                        |                                                       |                                                                                                      |
|------------|----|----------------------------------------------------------------------------------------------------------------------------------------------------------------------------------------------------------------------------------------|-------------------------------------------------------|------------------------------------------------------------------------------------------------------|
| Income     | 52 | <p><i>Indicate to what extent you agree with the following statement: In the past year, I have struggled with money in most months.</i></p> <p>(6 point, very much agree, agree, neutral, disagree, very much disagree, no answer)</p> | Item is self-developed, based on cognitive interviews | <p>Answers categorised into financial difficulties yes/no.</p> <p>Yes = very much agree + agree.</p> |
| Ethnicity  | 53 | <p><i>Where were you born?</i></p> <p>(9 point: Netherlands, Turkey, Morocco, Surinam, Germany, United Kingdom, Belgium, Elsewhere + textbox, no answer)</p>                                                                           | Based on CBS <sup>16</sup>                            | <p>Answers categorised into born in the Netherlands yes/no.</p>                                      |
| Conclusion |    | <p><i>Do you have any comments on a specific question?</i></p> <p><i>Please enter them below. Do not forget to mention the question number.</i></p>                                                                                    | Based on Douma. <sup>7</sup>                          | <p>Answers incorporated into answers to other questions if relevant.</p>                             |

#### References supplementary table 1

1. GfK B. Tevredenheidsonderzoek bevolkingsonderzoek darmkanker. 07-2018.
2. Stichting MLD. Darmkanker herkennen [Internet]. [Available from: <https://www.mlds.nl/kanker/darmkanker/darmkanker-herkennen/>].
3. Brown S. Likert Scale Examples for Surveys. Iowa State University December 2010.
4. Thuisarts. Ik heb last van bloedverlies uit de anus [Available from: <https://www.thuisarts.nl/bloedverlies-uit-anus/ik-heb-last-van-bloedverlies-uit-anus>].



5. Llovet D, Serenity M, Conn LG, Bravo CA, McCurdy BR, Dubé C, *et al.* Reasons For Lack of Follow-up Colonoscopy Among Persons With A Positive Fecal Occult Blood Test Result: A Qualitative Study. *The American Journal of Gastroenterology*. 2018;113(12):1872-80.
6. Plumb AA, Ghanouni A, Rainbow S, Djedovic N, Marshall S, Stein J, *et al.* Patient factors associated with non-attendance at colonoscopy after a positive screening faecal occult blood test. *Journal of Medical Screening*. 2016;24(1):12-19.
7. Douma KFL. The psychosocial and behavioral impact of familial adenomatous polyposis. Amsterdam 2009.
8. Schwarzer R, Fuchs R. Self-efficacy and health behaviours. *Predicting health behaviour: Research and practice with social cognition models*. Maidenhead, BRK, England: Open University Press; 1996. p. 163-96.
9. Tacken MA, Braspenning JC, Hermens RP, Spreeuwenberg PM, van den Hoogen HJ, de Bakker DH, *et al.* Uptake of cervical cancer screening in The Netherlands is mainly influenced by women's beliefs about the screening and by the inviting organization. *Eur J Public Health*. 2007;17(2):178-85.
10. Lerman C, Daly M, Sands C, Balshem A, Lustbader E, Heggan T, *et al.* Mammography adherence and psychological distress among women at risk for breast cancer. *Journal of the National Cancer Institute*. 1993;85(13):1074-80.
11. Weinstein ND, Kvitel A, McCaul KD, Magnan RE, Gerrard M, Gibbons FX. Risk perceptions: Assessment and relationship to influenza vaccination. *Health Psychol*. 2007;26(2):146-51.
12. Wallston KA. The validity of the multidimensional health locus of control scales. *Journal of health psychology*. 2005;10(5):623-31.
13. Burger JM, Cooper HM. The desirability of control. *Motivation and Emotion*. 1979;3(4):381-93.
14. Brandt HM, Dolinger HR, Sharpe PA, Hardin JW, Berger FG. Relationship of colorectal cancer awareness and knowledge with colorectal cancer screening. *Colorectal cancer*. 2012;1(5):383-96.
15. CBS) CBS. Bevolkingsontwikkeling; regio per maand 2019 [Available from: <https://opendata.cbs.nl/statline/#/CBS/nl/dataset/37230ned/table?dl=3FA3D>.
16. CBS. Enquete beroepsbevolking (EBB).

## Supplemental Table 2. Overview of Univariate Statistics

Variables that are included in the multivariate logistic regression analysis were marked grey.

| Items                                                    | Total<br>(N= 1821) |                    |         | Colonoscopy group<br>(N =1495 ) |                    | No Colonoscopy group<br>(N=326) |                    | P (X²) |
|----------------------------------------------------------|--------------------|--------------------|---------|---------------------------------|--------------------|---------------------------------|--------------------|--------|
|                                                          | N or mean          | %                  | Missing | N                               | %                  | N                               | %                  |        |
| Questionnaire filled out on paper?                       | 1504               | 82.6%              | 0%      | 1231                            | 82.3%              | 273                             | 83.7%              | .545   |
| Mean age                                                 | 66.5               | -                  | 4.7%    | 66.4                            | -                  | 67.1                            | -                  | .659   |
| Male                                                     | 1033               | 58.9%              | 3.7%    | 861                             | 59.7%              | 172                             | 55.5%              | .174   |
| Living with partner                                      | 1299               | 71.3%              | 4.7%    | 1110                            | 74.2%              | 189                             | 58.0%              | .000   |
| Having at least one child                                | 1475               | 84.7%              | 5.4%    | 1239                            | 86.4%              | 236                             | 76.9%              | .000   |
| Living in urban area                                     | 720                | 42.4%              | 6.8%    | 570                             | 40.5 %             | 150                             | 51.7%              | .000   |
| Educational level                                        |                    |                    | 6.8%    |                                 |                    |                                 |                    | .082   |
| Primary                                                  | 90                 | 4.7%               |         | 68                              | 4.8%               | 22                              | 7.6%               | .097   |
| Secondary                                                | 492                | 26.7%              |         | 397                             | 28.2%              | 95                              | 32.8%              | .341   |
| Vocational training                                      | 610                | 33.6%              |         | 509                             | 36.2%              | 101                             | 34.8%              | .288   |
| Higher education                                         | 504                | 27.6%              |         | 432                             | 30.7%              | 72                              | 24.8%              | .013   |
| Insufficient financial resources the past year           | 191                | 13%                | 19.1%   | 140                             | 11.4%              | 51                              | 20.6%              | .002   |
| Born in the Netherlands                                  |                    |                    | 4,1%    |                                 |                    |                                 |                    | .004   |
| Yes                                                      | 1622               | 92.8%              |         | 1348                            | 93.7%              | 274                             | 89%                |        |
| No                                                       | 125                | 7.2%               |         | 91                              | 6.3%               | 34                              | 11%                |        |
| Had 1 or more CRC related symptoms at time of FIT        | 622                | 34.2%              |         | 512                             | 34.2%              | 110                             | 33.7%              | .862   |
| Visible blood                                            | 422                | 24.5%              | 5.3%    | 335                             | 23.6%              | 87                              | 28.5%              | .070   |
| Tenesmus                                                 | 176                | 10.6%              | 9.0%    | 156                             | 11.4%              | 20                              | 6.8%               | .021   |
| Stool pattern change                                     | 190                | 11.1%              | 5.9%    | 171                             | 12.1%              | 19                              | 6.4%               | .004   |
| Weight loss                                              | 61                 | 3.6%               | 6.5%    | 53                              | 3.8%               | 8                               | 2.7%               | .352   |
| Had alternative explanation blood in stool               | 840                | 47.6%              | 3.1%    | 609                             | 41.9%              | 231                             | 74,3%              | .000   |
| Other medical issues                                     | 359                | 20.6%              | 4.2%    | 273                             | 19%                | 86                              | 28.2%              | .000   |
| Use of alternative medicine                              | 76                 | 4.3%               | 3.2%    | 62                              | 4.3%               | 14                              | 4.6%               | .813   |
| Has previous colonoscopy experience                      | 575                | 32.6%              | 3.0%    | 501                             | 34.4%              | 74                              | 23.9%              | .000   |
| Negative experience prior colonoscopy                    | 295                | 17%                | 4.8%    | 254                             | 17.8%              | 41                              | 13.3%              | .056   |
| CRC diagnose (but not in past year)                      | 20                 | 1,1%               | 2.7%    | 17                              | 1.0%               | 3                               | 1.0%               | .115   |
| Diagnosis other type of cancer                           | 266                | 15.2%              | 3.8%    | 231                             | 16%                | 35                              | 11,4%              | .040   |
| Negative colonoscopy experience of others                | 228                | 12.8%              | 2.4%    | 167                             | 11.4%              | 61                              | 19.5%              | .000   |
| Contact with GP regarding FIT result                     | 608                | 34.6%              | 3.5%    | 484                             | 33.5%              | 124                             | 39,7%              | .035   |
| Negative colonoscopy advice from anyone                  | 82                 | 4,7%               | 3.2%    | 37                              | 2.5%               | 45                              | 14.5%              | .000   |
| Positive colonoscopy advice from anyone                  | 749                | 42.7%              | 3.6%    | 657                             | 45.4%              | 92                              | 29.8%              | .000   |
| Thinks that loved ones would support colonoscopy         | 1433               | 82.2%              | 4.3%    | 1299                            | 90.3%              | 134                             | 44.1%              | .000   |
| Thinks that GP would support colonoscopy                 | 1272               | 73.7%              | 5.2%    | 1143                            | 79.9%              | 129                             | 43.6%              | .000   |
| Attended prescheduled appointment for colonoscopy intake | 1392               | 78.8%              | 3.0%    | 1306                            | 89,8%              | 86                              | 27.6%              | .000   |
| Worries sufficiently discussed                           | 1171               | 92.8% <sup>1</sup> | 10.2%   | 1109                            | 93.9% <sup>1</sup> | 62                              | 76.5% <sup>1</sup> | .000   |

|                                                                         |       |                    |       |       |                    |      |                    |      |
|-------------------------------------------------------------------------|-------|--------------------|-------|-------|--------------------|------|--------------------|------|
| Sufficient opportunity for questions                                    | 1202  | 95% <sup>1</sup>   | 10%   | 1135  | 95.9% <sup>1</sup> | 67   | 82.7% <sup>1</sup> | .000 |
| Possibilities sufficiently discussed                                    | 1138  | 90.5% <sup>1</sup> | 10.4% | 1075  | 91.4% <sup>1</sup> | 63   | 76.8% <sup>1</sup> | .000 |
| Referred to other clinic/hospital                                       | 191   | 14.3%              | 9.2%  | 179   | 14.6%              | 12   | 10.8%              | .277 |
| Cancer worry scale score (1-19) <sup>2</sup>                            | 3.71  | -                  | 16.6% | 3.98  | -                  | 2.44 | -                  | .000 |
| High estimated probability of CRC after FIT                             | 106   | 7%                 | 17.1% | 100   | 8%                 | 6    | 2.3%               | .001 |
| Low estimated probability of CRC after FIT                              | 1083  | 71.8%              | 17.1% | 845   | 67.9%              | 238  | 89.8%              | .000 |
| High probability of CRC compared with others                            | 99    | 5,5%               | 17.1% | 92    | 6,3%               | 7    | 2,2%               | .001 |
| Low probability of CRC compared with others                             | 507   | 34%                | 18.2% | 387   | 31.5%              | 120  | 46.2%              | .000 |
| Negative on willing to undergo CRC treatment                            | 59    | 3.9%               | 16.7% | 25    | 2%                 | 34   | 13%                | .000 |
| Total trust score (1-13) <sup>2</sup>                                   | 10.67 | -                  | 4.3%  | 10.88 | -                  | 9.66 | -                  | .000 |
| Did not like that intake was already planned                            | 492   | 28.5%              | 5,1%  | 342   | 23.8%              | 150  | 50.8%              | .000 |
| Difficulty with deciding upon colonoscopy                               | 214   | 12.3%              | 4.8%  | 98    | 6.8%               | 116  | 39.2%              | .000 |
| Wanting someone else to decide upon colonoscopy                         | 312   | 18%                | 4.9%  | 233   | 15.3%              | 79   | 26,7%              | .000 |
| Not enough opportunity to discuss desirability of colonoscopy           | 244   | 14.1%              | 5.2%  | 127   | 8.9%               | 117  | 39.9%              | .000 |
| Uncomfortable with unfamiliar colonoscopy location                      | 230   | 13.8%              | 8.4%  | 143   | 10.2%              | 87   | 33.2%              | .000 |
| Locus of control: internal orientation (6-36) <sup>2</sup>              | 19.8  | -                  | 5.7%  | 20    | -                  | 18,8 | -                  | .008 |
| Locus of control: physician orientation(6-36) <sup>2</sup>              | 20.7  | -                  | 5.6%  | 20,9  | -                  | 19,6 | -                  | .003 |
| Locus of control: chance orientation (6-36) <sup>2</sup>                | 20.8  | -                  | 5.7%  | 21    | -                  | 20,1 | -                  | .012 |
| Low score on self efficacy <sup>3</sup>                                 | 36    | 2.1%               | 7.0%  | 14    | 1.0%               | 22   | 8.6%               | .000 |
| Time of death is predestined                                            | 536   | 31.4%              | 6.2%  | 414   | 29.3%              | 122  | 41.6%              | .000 |
| Living in the moment                                                    | 351   | 20.6%              | 6.1%  | 261   | 18.4%              | 90   | 30.4%              | .000 |
| Preferring short, good life to longer, less good one                    | 536   | 31.3%              | 6.0%  | 414   | 29.2%              | 122  | 41.5%              | .000 |
| Not feeling healthy enough for colonoscopy                              | 65    | 3.8%               | 6.2%  | 27    | 1.9%               | 38   | 13.1%              | .000 |
| Feeling too old for colonoscopy                                         | 52    | 3%                 | 5.9%  | 22    | 1.6                | 30   | 10.2%              | .000 |
| <b>Knowledge questions<sup>4</sup></b>                                  |       |                    |       |       |                    |      |                    |      |
| CRC always causes symptoms                                              | 904   | 52.8%              | 5.9%  | 700   | 49.3%              | 204  | 69.4%              | .000 |
| Positive FIT usually means cancer                                       | 417   | 24.3%              | 5.8%  | 295   | 20.8%              | 122  | 41.4%              | .000 |
| Screening is meant for persons with symptoms                            | 562   | 32.9%              | 6.1%  | 414   | 29.3%              | 148  | 50.2%              | .000 |
| Negative FIT ensures absence of cancer                                  | 806   | 47%                | 5.8%  | 659   | 46.4%              | 147  | 50%                | .257 |
| Colonoscopy has high risk of complications                              | 647   | 37.8%              | 6.0%  | 460   | 32.4%              | 187  | 64%                | .000 |
| Having symptoms means that cure is not possible                         | 371   | 21.7%              | 6.0%  | 269   | 19%                | 102  | 34.7%              | .000 |
| CRC does not develop over several years <sup>5</sup>                    | 933   | 54.4%              | 5.8%  | 750   | 52.7%              | 183  | 62.5%              | .002 |
| Removing polyps does not prevent CRC <sup>5</sup>                       | 621   | 36.4%              | 6.2%  | 436   | 32.7%              | 158  | 53,9%              | .000 |
| CRC cannot be cured, even if it is found at an early stage <sup>5</sup> | 373   | 21.8%              | 6.0%  | 281   | 19.8%              | 92   | 31.3%              | .000 |
| More than 75% of people with CRC die of it                              | 913   | 53.2%              | 5.8%  | 716   | 50.4%              | 197  | 67%                | .000 |
| High levels of trust in ability to self-detect CRC <sup>5</sup>         | 251   | 14.6%              | 5.8%  | 152   | 10.7%              | 99   | 33.8%              | .000 |

<sup>1</sup>Percentages of people who attended intake appointment

<sup>2</sup>Locus of control: degree to which one has control over outcome of events. Internal locus is own influence, doctor locus medical professional's influence, chance locus is influence by chance. Scores are sum scores of multiple it items

<sup>3</sup>Self-efficacy is the perceived ability to undergo colonoscopy when deemed necessary. Score is sum score of multiple items

<sup>4</sup>N= answers of 'true' or 'don't know' combined

<sup>5</sup>Questions were originally phrased positive (e.g. 'CRC develops over several years'), for readability of this table rephrased in negative sense
